# Supplementary material
Source: publisher site journal article supplement (https://www.dovepress.com/article/344567)

**Table S1. Identification of mental illness.**

| **ICD-9 codes** | **ICD-10 codes** | **OHIP codes** | **DSM-IV codes** |
| --- | --- | --- | --- |
| 295-298, 300, 301, 308 | F20 (excluding F20.4)-F25, F28-F34, F38-F43, F48.8, F48.9, F53.0, F53.1, F60-F62, F68, F69 | General service codes A001, A003-A008, A888, A901, A905 or mental health service codes K005, K007, K623 with a family physician or visits with a psychiatrist with diagnostic codes 295-298, 300-302, 306, 309, 311 | 295-298, 300, 301 (except 301.1), 308.3, 309.0, 309.24, 309.28, 309.3, 309.4, 309.8, 309.9, PROVDX: 1,5, 6, 7, 15, 16 |

Abbreviations: DSM = Diagnostic and Statistical Manual of Mental Disorders; ICD = International Statistical Classification of Diseases and Related Health Problems (Canadian Coding Standards); OHIP = Ontario Health Insurance Plan.

**Table S2. Identification of autoimmune disease using acute health care encounters and prevalence in the cohort.**

| **Autoimmune condition** | **ICD-9 codes** | **ICD-10 codes** | **N (%) in the cohort** |
| --- | --- | --- | --- |
| Conditions with brain-reactive antibodies |  |  |  |
| Autoimmune hepatitis | Not available | K75.4 | 75 (0.01) |
| Autoimmune thyroiditis | 245.2 | E06.3 | 492 (0.06) |
| Celiac disease | 579.0 | K90.0 | 1393 (0.18) |
| Guillain-Barre syndrome | 357.0 | G61.0 | 134 (0.02) |
| Multiple sclerosis | 340 | G35 | 988 (0.12) |
| Sjogren syndrome | 710.2 | M35.0 | 47 (0.01) |
| Systemic lupus erythematosus | 710.0 | M32.1, M32.9 | 339 (0.04) |
| Thyrotoxicosis, Grave’s disease | Not available | E05.0 | 360 (0.05) |
| Other conditions |  |  |  |
| Alopecia areata | Not available | L63 | 50 (0.01) |
| Ankylosing spondylitis | 720.0 | M45 | 50 (0.01) |
| Autoimmune haemolytic anaemia | 283.0 | D59.1 | 42 (0.01) |
| Crohn’s disease | 555 | K50 | 1971 (0.25) |
| Dermatopolymyositis | 710.3, 710.4 | M33 | 82 (0.01) |
| Idiopathic thrombocytopenic purpura | Not available | D69.3 | 256 (0.03) |
| Iridocyclitis | 364.0-364.3 | H20 | 1407 (0.18) |
| Juvenile arthritis | 714.3 | M08 | 26 (0.00) |
| Myasthenia gravis | 358.0 | G70.0 | 63 (0.01) |
| Pemphigus | 694.4 | L10 | 22 (0.00) |
| Pemphigoid | 694.5 | L12 | 37 (0.00) |
| Pernicious anaemia | 281.0 | D51.0 | 40 (0.01) |
| Polymyalgia rheumatica | 446.5, 725 | M31.5, M31.6, M35.3 | 79 (0.01) |
| Primary adrenocortical insufficiency | Not available | E27.1 | 61 (0.01) |
| Primary biliary cirrhosis | 571.6 | K74.3 | 52 (0.01) |
| Psoriasis vulgaris | 696.0, 696.1 | L40, not L40.4 | 390 (0.05) |
| Scleroderma | 710.1 | M34 | 75 (0.01) |
| Seropositive rheumatoid arthritis | 714.0-714.2, 714.9 | M05-M06 | 680 (0.09) |
| Ulcerative colitis | 556 | K51 | 2406 (0.30) |
| Vitiligo | Not available | L80 | 21 (0.00) |
| Wegener granulomatosis | 446.4 | M31.3 | 57 (0.01) |

Abbreviations: ICD = International Statistical Classification of Diseases and Related Health Problems (Canadian Coding Standards).

Not available = no specific ICD-9 code available.

**Table S3. Identification of autoimmune disease using validated algorithms and prevalence in the cohort.**

| **Autoimmune condition** | **Acute health care encounters** | | | **Outpatient visits** | | **Sensitivity, specificity (%)** | **N (%) in cohort** |
| --- | --- | --- | --- | --- | --- | --- | --- |
| **Number of**  **encounters** | **ICD-9 codes** | **ICD-10 codes** | **Number of encounters** | **OHIP codes** |
| Crohn’s disease and ulcerative colitis | ≥ 1 hospitalizations or emergency department visits | 555, 556 | K50, K51 | ≥ 2 years of OHIP eligibility and ≥ 5 visits | 555, 556 | 76.8, 96.2 | 3005 (0.38) |
| Multiple sclerosis | ≥ 1 hospitalizations or emergency department visits | 340 | G35 | ≥ 5 visits | 340 | 84.2, 100 | 2082 (0.26) |
| Psoriasis vulgaris | ≥ 1 hospitalizations | 696.0, 696.1 | L40 | ≥ 1 visits | 696 | Not available | 16 622 (2.1) |
| Rheumatoid arthritis | ≥ 1 hospitalizations or emergency department visits | 714 | M05, M06 | ≥ 3 visits, with ≥ 1 by a specialist | 714 | 78, 100 | 4266 (0.54) |
| Systemic lupus erythematosus | ≥ 1 hospitalizations | 710.0 | M32 | ≥ 3 visits, with ≥ 1 by a specialist | 710 | Not available | 326 (0.04) |

Abbreviations: ICD = International Statistical Classification of Diseases and Related Health Problems (Canadian Coding Standards); OHIP = Ontario Health Insurance Plan.

**Table S4. Risk of incident autoimmune disease after 90 days among women with mental illness arising in the perinatal period compared to women with mental illness arising outside of the perinatal period and women without mental illness.**

| **Analysis** | **Groups being compared** | **Number (%) with outcome event** | **Incidence rate per 100,000 person-years** | | **Model a** | |
| --- | --- | --- | --- | --- | --- | --- |
| **Incidence rate** | **95% CI** | **HR** | **95% CI** |
| Perinatal mental illness by timing | Mental illness arising between conception and 90 days postpartum | 631 (1.7) | 126.4 | 116.6-136.3 | 0.90 | 0.82-0.97 |
| Mental illness arising 91-365 days postpartum | 457 (2.0) | 159.4 | 144.8-174.0 | 1.14 | 1.03-1.25 |
| Mental illness arising outside the perinatal period | 4778 (1.8) | 140.7 | 136.7-144.7 | 1.00 | Referent |
|  |  |  |  |  |  |
| Mental illness arising between conception and 90 days postpartum | 631 (1.7) | 126.4 | 116.6-136.3 | 1.40 | 1.29-1.52 |
| Mental illness arising 91-365 days postpartum | 457 (2.0) | 159.4 | 144.8-174.0 | 1.78 | 1.62-1.96 |
| No mental illness | 4950 (1.1) | 88.9 | 86.5-91.4 | 1.00 | Referent |

a Groups were matched onage, parity, neighbourhood income quintile, area of residence, other chronic conditions, and substance use disorders.

**Table S5. Risk of incident autoimmune disease after 90 days among women with mental illness arising in the perinatal period compared separately to: women with mental illness arising outside the perinatal period, women without mental illness who were within a perinatal period at index, and women without mental illness who were not within a perinatal period at index.**

| **Outcome** | **Groups being compared** | **Number (%) with outcome event** | **Incidence rate per 100,000 person-years** | | **Model a** | |
| --- | --- | --- | --- | --- | --- | --- |
| **Incidence rate** | **95% CI** | **HR** | **95% CI** |
| Any autoimmune disease | Mental illness arising in the perinatal period | 1088 (1.8) | 138.4 | 130.2-146.7 | 0.98 | 0.92-1.05 |
| Mental illness arising outside the perinatal period | 4778 (1.8) | 140.7 | 136.7-144.7 | 1.00 | Referent |
|  |  |  |  |  |  |
| Mental illness arising in the perinatal period | 1088 (1.8) | 138.4 | 130.2-146.7 | 1.54 | 1.43-1.66 |
| No mental illness but within a perinatal period at index | 1955 (1.1) | 89.1 | 85.2-93.1 | 1.00 | Referent |
|  |  |  |  |  |  |
| Mental illness arising in the perinatal period | 1088 (1.8) | 138.4 | 130.2-146.7 | 1.54 | 1.43-1.65 |
| No mental illness and not within a perinatal period at index | 2995 (1.0) | 88.8 | 85.6-92.0 | 1.00 | Referent |
|  |  |  |  |  |  |  |
| Autoimmune disease with brain-reactive antibodies | Mental illness arising in the perinatal period | 403 (0.7) | 51.0 | 46.0-56.0 | 1.00 | 0.90-1.12 |
| Mental illness arising outside the perinatal period | 1735 (0.7) | 50.8 | 48.4-53.2 | 1.00 | Referent |
|  |  |  |  |  |  |
| Mental illness arising in the perinatal period | 403 (0.7) | 51.0 | 46.0-56.0 | 1.68 | 1.48-1.90 |
| No mental illness but within a perinatal period at index | 664 (0.4) | 30.2 | 27.9-32.5 | 1.00 | Referent |
|  |  |  |  |  |  |
| Mental illness arising in the perinatal period | 403 (0.7) | 51.0 | 46.0-56.0 | 1.73 | 1.54-1.94 |
| No mental illness and not within a perinatal period at index | 978 (0.3) | 28.9 | 27.1-30.7 | 1.00 | Referent |
|  |  |  |  |  |  |  |
| Other autoimmune disease | Mental illness arising in the perinatal period | 708 (1.2) | 89.8 | 83.2-96.4 | 0.97 | 0.89-1.05 |
| Mental illness arising outside the perinatal period | 3153 (1.2) | 92.6 | 89.4-95.8 | 1.00 | Referent |
|  |  |  |  |  |  |
| Mental illness arising in the perinatal period | 708 (1.2) | 89.8 | 83.2-96.4 | 1.48 | 1.35-1.62 |
| No mental illness but within a perinatal period at index | 1328 (0.8) | 60.4 | 57.2-63.7 | 1.00 | Referent |
|  |  |  |  |  |  |
| Mental illness arising in the perinatal period | 708 (1.2) | 89.8 | 83.2-96.4 | 1.44 | 1.32-1.57 |
| No mental illness and not within a perinatal period at index | 2076 (0.7) | 61.4 | 58.8-64.1 | 1.00 | Referent |

**Table S6. Risk of incident autoimmune disease after 90 days, using alternative outcome definitions, among women with mental illness arising in the perinatal period compared to women with mental illness arising outside the perinatal period and women without mental illness.**

| **Outcome** | **Groups being compared** | **Number (%) with outcome event** | **Incidence rate per 100,000 person-years** | | **Model b** | |
| --- | --- | --- | --- | --- | --- | --- |
| **Incidence rate** | **95% CI** | **HR** | **95% CI** |
| Autoimmune disease, including related physician visits | Mental illness arising in the perinatal period | 8085 (13.3) | 1,109.7 | 1,085.5-1,133.9 | 1.00 | 0.98-1.03 |
| Mental illness arising outside the perinatal period | 35 023 (13.2) | 1,109.3 | 1,097.7-1,120.9 | 1.00 | Referent |
|  |  |  |  |  |  |
| Mental illness arising in the perinatal period | 8085 (13.3) | 1,109.7 | 1,085.5-1,133.9 | 1.45 | 1.42-1.48 |
| No mental illness | 40 735 (8.7) | 766.4 | 758.9-773.8 | 1.00 | Referent |
|  |  |  |  |  |  |  |
| Autoimmune disease, using validated algorithms for specific conditions a | Mental illness arising in the perinatal period | 2481 (4.1) | 319.8 | 307.2-332.3 | 1.04 | 1.00-1.09 |
| Mental illness arising outside the perinatal period | 10 292 (3.9) | 306.4 | 300.5-312.3 | 1.00 | Referent |
|  |  |  |  |  |  |
| Mental illness arising in the perinatal period | 2481 (4.1) | 319.8 | 307.2-332.3 | 1.36 | 1.30-1.42 |
| No mental illness | 12 827 (2.7) | 232.6 | 228.6-236.6 | 1.00 | Referent |

a Includes Crohn’s disease and ulcerative colitis, multiple sclerosis, psoriasis vulgaris, rheumatoid arthritis, and systemic lupus erythematosus.

b Groups were matched onage, parity, neighbourhood income quintile, area of residence, other chronic conditions, and substance use disorders.

**Table S7. Risk of incident autoimmune disease after 90 days among women with mental illness arising in the perinatal period compared to each of: women with mental illness arising outside of the perinatal period, women without mental illness who were in a perinatal period at index, and women without mental illness who were not in a perinatal period at index, excluding women with only one mental health encounter from the comparison group.**

| **Outcome** | **Groups being compared** | **Number (%) with outcome event** | **Incidence rate per 100,000 person-years** | | **Model** b | |
| --- | --- | --- | --- | --- | --- | --- |
| **Incidence rate** | **95% CI** | **HR** | **95% CI** |
| Any autoimmune disease | Mental illness arising in the perinatal period | 1088 (1.8) | 138.4 | 130.2-146.7 | 0.98 | 0.92-1.05 |
| Mental illness arising outside the perinatal period | 4778 (1.8) | 140.7 | 136.7-144.7 | 1.00 | Referent |
|  |  |  |  |  |  |
| Mental illness arising in the perinatal period | 1088 (1.8) | 138.4 | 130.2-146.7 | 1.61 | 1.50-1.72 |
| No mental illness a | 3346 (1.0) | 84.7 | 81.8-87.6 | 1.00 | Referent |

a Excludes women with only one mental health encounter with a psychiatrist or general practitioner.

b Groups were matched onage, parity, neighbourhood income quintile, area of residence, other chronic conditions, and substance use disorders.

**Figure S1. Cumulative probability of autoimmune disease after 90 days among women with mental illness arising in the perinatal period, women with mental illness arising outside the perinatal period, and women without mental illness who were and were not in a perinatal period at index.**


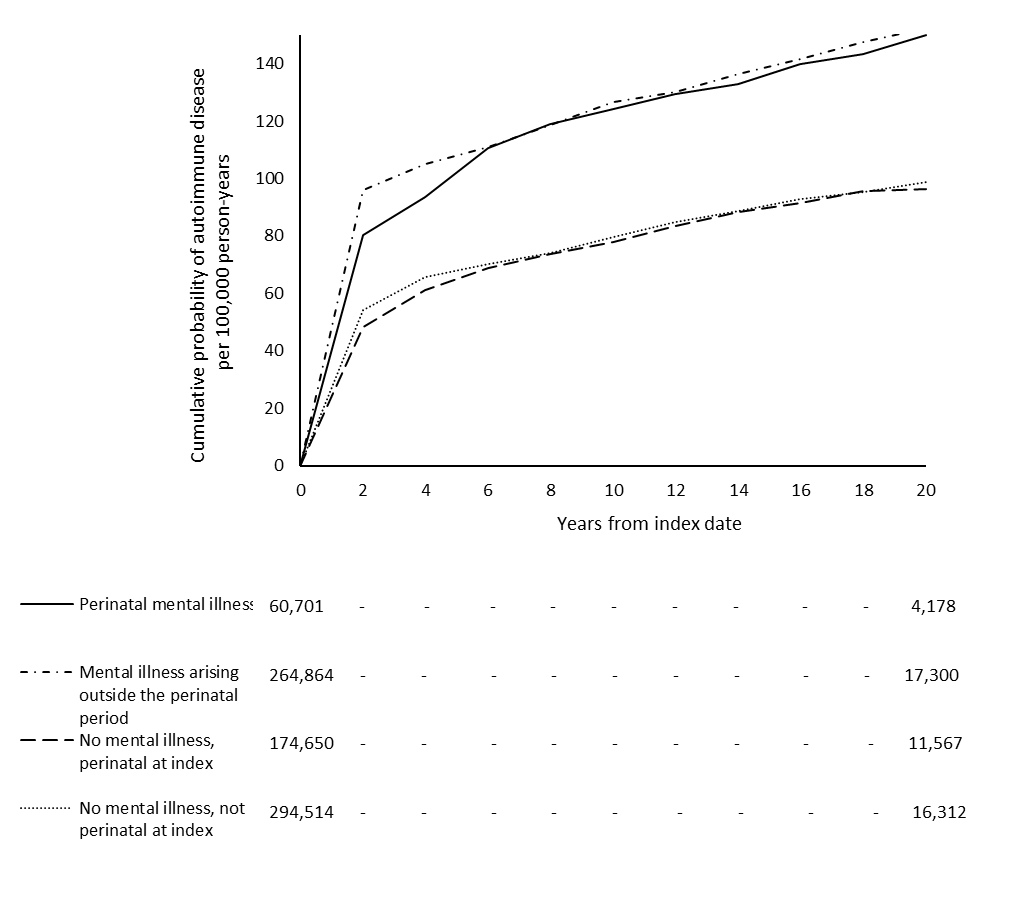

Supplement: Supplementary file 1 [file get_supplementary_file.php]
